1                   **DIAGNOSTIC ACCURACY OF NON-INVASIVE DETECTION OF SARS-COV-2**  
2                   **INFECTION BY CANINE OLFACTION**  
3  
4

5   Dominique GRANDJEAN<sup>1</sup>, Caroline ELIE<sup>2,3</sup>, Capucine GALLET<sup>1</sup>, Clotilde JULIEN<sup>1</sup>, Vinciane ROGER<sup>1</sup>, Loïc  
6   DESQUILBET<sup>1</sup>, Guillaume ALVERGNAT<sup>4</sup>, Séverine DELARUE<sup>7</sup>, Audrey GABASSI<sup>7</sup>, Marine MINIER<sup>7</sup>, Laure  
7   CHOUPEAUX<sup>2</sup>, Solen KERNEIS<sup>5,6</sup>, Constance DELAUGERRE<sup>7</sup>, Jérôme LE GOFF<sup>7</sup>, Jean-Marc TRELUYER<sup>2,3</sup>

8  
9   **Affiliations of the authors**

10  
11   <sup>1</sup> Ecole Nationale Vétérinaire d'Alfort (Alfort School of Veterinary Medicine), University Paris-Est,  
12   Maisons-Alfort, France

13   <sup>2</sup> Unité de Recherche Clinique / Centre Investigation Clinique, APHP, Hôpital Necker-Enfants malades,  
14   F-75015 Paris, France

15   <sup>3</sup> Université de Paris, EA 7323 Pharmacologie et thérapeutique de l'enfant et de la femme enceinte,  
16   F-75015 Paris, France

17   <sup>4</sup> International Affairs Bureau, Ministry of Interior of the UAE, United Arab Emirates

18   <sup>5</sup> Université de Paris, INSERM, IAME, F-75018 Paris, France

19   <sup>6</sup> Equipe de Prévention du Risque Infectieux, AP-HP, Hôpital Bichat, F-75018 Paris, France

20   <sup>7</sup> Service de Virologie, AP-HP, Hôpital Saint Louis, F-75010 Paris, France

21  
22   **Corresponding Author:** Jean-Marc Tréluyer, MD, Unité de Recherche Clinique, Hôpital Necker-

23   Enfants malades, 149, rue de Sèvres, 75015 Paris, France; Phone: +33 1 58413481; Fax: +33 1

24   44495950;

25   Email: [jean-marc.treluyer@aphp.fr](mailto:jean-marc.treluyer@aphp.fr)

26   **Running title:** Detection of SARS-CoV-2 infection by canine olfaction

27

28 **ABSTRACT**

29 **BACKGROUND**

30 Throughout the COVID-19 pandemic, testing individuals remains a key action. One approach to rapid  
31 testing is to consider the olfactory capacities of trained detection dogs.

32 **METHODS**

33 Prospective cohort study in two community COVID-19 screening centers. Two nasopharyngeal swabs  
34 (NPS), one saliva and one sweat samples were simultaneously collected. The dog handlers (and the  
35 dogs...) were blinded with regards to the Covid status. The diagnostic accuracy of non-invasive  
36 detection of SARS-CoV-2 infection by canine olfaction was assessed as compared to nasopharyngeal  
37 RT-PCR as the reference standard, saliva RT-PCR and nasopharyngeal antigen testing.

38 **RESULTS**

39 335 ambulatory adults (143 symptomatic and 192 asymptomatic) were included. Overall, 109/335  
40 participants tested positive on nasopharyngeal RT-PCR either in symptomatic (78/143) or in  
41 asymptomatic participants (31/192). The overall sensitivity of canine detection was 97% (95% CI, 92  
42 to 99) and even reached 100% (95% CI, 89 to 100) in asymptomatic individuals compared to NPS RT-  
43 PCR. The specificity was 91% (95% CI, 72 to 91), reaching 94% (95% CI, 90 to 97) for asymptomatic  
44 individuals. The sensitivity of canine detection was higher than that of nasopharyngeal antigen  
45 testing (97% CI: 91 to 99 versus 84% CI: 74 to 90,  $p=0.006$ ), but the specificity was lower (90% CI: 84  
46 to 95 versus 97% CI: 93 to 99,  $p=0.016$ ).

47 **CONCLUSIONS**

48 Non-invasive detection of SARS-CoV-2 infection by canine olfaction could be one alternative to NPS  
49 RT-PCR when it is necessary to obtain a result very quickly according to the same indications as  
50 antigenic tests in the context of mass screening.

51

## 52 INTRODUCTION

53 Facing the COVID-19 crisis, early and efficient screenings are needed to limit the spread of the virus,  
54 allowing for the prompt isolation of positive individuals, a key action in this constant fight. Presently,  
55 most ongoing diagnostic COVID-19 testing involves nasopharyngeal sampling for RT-PCR,  
56 nasopharyngeal point-of-care antigen testing or saliva RT-PCR to identify the pathogen.  
57 Nasopharyngeal sampling for RT-PCR is the reference test but has the drawback of invasiveness and  
58 discomfort (nasopharyngeal sampling) and/or delay (RT-PCR) in obtaining the result.

59 Volatile organic compounds (VOC) have the potential to become a revolutionary and non-invasive  
60 approach to medical diagnostic in humans for conditions like cancer and degenerative or infectious  
61 diseases. Aksenov [1,2] studied the VOCs produced by cultures of B-lymphocytes infected by three  
62 influenza viruses: avian H9N2, avian H6N2 and human H1N1. The families of collected VOCs turned  
63 out to be unique and specific to each viral subtype. The authors concluded that the minor alterations  
64 induced by the virus on the cell's genome expression led to a specific change in the production of  
65 VOCs in the cellular metabolism. Recently, Abd El Qader [3] showed the specificity of bacterial or  
66 viral species in the VOCs produced by infected cell cultures. Schivo [4] also identified a specific  
67 volatilome on airway cells infected by a rhinovirus. Canine olfactory detection capacities have been  
68 utilized for years in police enforcement to detect narcotics or forensic remains, explosives, bank  
69 notes, for human search and rescue missions and even to locate landmines.

70 Our hypothesis, the object of our previous proof of concept [5], was based on the potential excretion  
71 of specific VOCs in the sweat, induced by SARS-CoV-2 cellular actions or replications generating VOCs  
72 that the dogs can detect.

73 The objective of this prospective blinded multicenter study was to compare the diagnostic accuracy  
74 of the detection of SARS-CoV-2 infection by canine olfaction with the current reference standard  
75 (nasopharyngeal RT-PCR) and two alternate diagnostic strategies (nasopharyngeal antigenic test and  
76 saliva RT-PCR) in community testing centers.

77

78

## 79 **MATERIALS AND METHODS**

80 This research is part of the “SALICOV-APHP” study (Evaluation of a strategy of SARS-CoV-2 infection  
81 testing on a general population, based on the utilization of new detection or diagnostic orientation  
82 approaches), promoted by Assistance Publique-Hôpitaux de Paris, France. The SALICOV-APHP study  
83 was approved the Protection of Persons Committee (CPP) Ile-de France III (number 3840-NI) and is  
84 registered on [clinicaltrials.gov](https://clinicaltrials.gov) (NCT04578509). The protocol was approved for the dogs by the  
85 committee on the ethics of animal experiments of the Ecole Nationale Vétérinaire d’Alfort. All  
86 research procedures were employed in accordance with the relevant guidelines and regulations.

### 87 **Recruitment of participants**

88 Participants were recruited from two COVID screening centers in Paris piloted by APHP. Informed  
89 consent was obtained from all subjects. Eligible persons received detailed oral and written  
90 information[6]. Participants were prospectively enrolled if they were not opposed to participating in  
91 the study. The following data were collected: age, gender, medical background, current symptoms  
92 (temperature higher than 37.8°C, chills, cough, rhinorrhea, muscular pain, loss of olfaction or taste,  
93 persisting headache, severe asthenia, etc.) and their onset date, alcohol/coffee/food/tobacco  
94 consumption or tooth cleaning within 2 hours and 24 hours prior to the test.

### 95 **Samples**

96 Sweat samples were collected by dedicated APHP sampling teams by asking the participants to place  
97 two sterile surgical compresses under their armpits for 2 min. Samples were stored in sterile medical  
98 anti-UV glass containers, disinfected by the sampler’s helper, anonymously coded, then placed into a  
99 second plastic envelope. Individual anonymous data were registered by APHP staff for each coded  
100 sample. All samples were transferred within the day of collection from the sampling site to the  
101 testing site in coolers that were cleaned and disinfected with a 10% aqueous acetone solution after  
102 each use. All samples were stored until they were to be sniffed by the dogs in a minus 20°C freezer  
103 and were never manipulated without disposable surgical gloves to prevent contamination.

104 Nasopharyngeal samples (NPS) were collected by a trained nurse, and participants were asked to  
105 self-collect the saliva sample after swishing saliva in their mouths for 30 seconds [6].

106 **Canine resources**

107 The dogs involved in this study belong to French fire departments (Service départemental d'Incendie  
108 et de Secours – SDIS of Yvelines and Oise) and to the Ministry of the Interior of the United Arab  
109 Emirates (provided on the occasion to increase the number of operational dogs involved).

110 They all were trained in the same way according to the training protocol we developed in a previous  
111 publication, with line-ups of positive and negative olfaction cones based on positive reinforcement  
112 (toys) and validated similarly for their individual sensitivities and specificities [5].

113 The welfare of the dogs was fully respected, with toy rewards and a total absence of work-induced  
114 physical or mental fatigue. This study was carried out in strict accordance with the recommendations  
115 published in the guide for the care and use of animals edited by French law (articles R214-87 to  
116 R214-137 of the French Rural Code).

117 **Testing protocol**

118 The testing sessions took place in a dedicated room (Figures 1) in the Alfort School of Veterinary  
119 Medicine. A line-up consisting of 10 olfaction cones was placed in the room. During trials, all the  
120 cones contained the unfamiliar samples, so neither the dog handlers, the data recorder nor any of  
121 the individuals present knew anything about the positivity/negativity of the samples. Once the dogs  
122 had performed the line-up, the cones and the background were cleaned with high pressure vapor,  
123 new samples were placed and a new trial cycle could start. For each new sample placement, the  
124 person in charge had to wear new disposable gloves (of the same brand during the entire period of  
125 testing sessions) and a mask in order not to contaminate the olfactory environment. Each line-up was  
126 sniffed by at least two dogs in order to mimic a real operational situation.

127 **Nasopharyngeal and saliva RT-PCR**

128 For nasopharyngeal and saliva samples, nucleic acid extraction was performed with the MGIEasy  
129 Nucleic Acid Extraction Kit (MGI Tech Co, Shenzhen, China) on an MGISP-960 instrument (MGI Tech  
130 Co). SARS CoV-2 RNA amplification was performed using the TaqPath™ COVID-19 CE IVD RT PCR Kit  
131 (Thermo Fisher Scientific, Coutaboeuf, France). This technique provides results expressed as a cycle  
132 threshold (Ct) for each gene target (ORF1ab, N and S genes) [6].

133 **Detection of other pathogens in saliva**

134 The detection of other viruses (adenovirus, coronaviruses (229E, HKU1, NL63, and OC43), human  
135 metapneumovirus A and B, influenza , influenza A H1, influenza A H3, influenza A H1N1/2009,  
136 influenza B, parainfluenza viruses (1, 2, 3, and 4), rhinovirus/enterovirus, respiratory syncytial virus A  
137 and B) and intracellular bacteria (*Bordetella pertussis*, *Chlamydomphila pneumoniae*, and *Mycoplasma  
138 pneumoniae*) was performed in saliva samples with the multiplex test QIAstat-Dx® Respiratory SARS-  
139 CoV-2 Panel QIAstat (Qiagen, Courtaboeuf, France). Briefly, 100 µL of saliva was mixed with 400 µL of  
140 NeuMoDx Viral Lysis Buffer (NeuMoDx Molecular, Inc., Ann Arbor, MI). Then 300 µl of the mix was  
141 immediately added to the SARS-CoV-2 Panel cartridge placed into the QIAstat Dx Analyzer System  
142 (Qiagen). The QIAstat-Dx Analyzer software processes controls, interprets the sample data and  
143 provides Ct values for detected targets.

144 **Statistical analysis**

145 Sample size was calculated assuming that the sensitivity of the index tests was greater than or equal  
146 to 60%. To allow sufficient precision ( $\pm 10\%$ ), 93 subjects with positive nasopharyngeal RT-PCR results  
147 were needed in each of the two subgroups (symptomatic and asymptomatic participants). To  
148 account for samples excluded for technical reasons, a sample size of 110 subjects with positive  
149 nasopharyngeal RT-PCR results was needed in each of these subgroups. As preliminary results  
150 indicate that viral loads were not different between symptomatic and asymptomatic patients, the  
151 scientific committee of the study, during a planned meeting on December 16, 2020, recommended  
152 performing the analysis as soon as 93 subjects with positive nasopharyngeal RT-PCR results were  
153 included, whether symptomatic or asymptomatic.

154 RT-PCR results were considered positive if at least one gene was detected. For the RT-PCR technique,  
155 the Ct values reported are those for the ORF1a gene, and if not amplified, for the N gene (and for the  
156 S gene if the N gene was not amplified).

157 An uncertain canine detection test (the dog shows great interest in the sample, but does not  
158 immediately sit down) was considered positive. For samples that were processed by three or more  
159 dogs, only the results of two dogs were recorded at random. A sample was considered positive if  
160 both dogs marked the sample, and negative in all other cases.

161 Quantitative data were expressed as medians [interquartile range], and qualitative data as numbers  
162 (percentages). The diagnostic accuracy of the index tests was evaluated by calculating sensitivity and  
163 specificity. Confidence intervals were calculated by the exact binomial method. Subgroup analyses  
164 were performed according to: i) the presence of symptoms on the day of testing, ii) the Ct value of  
165 the nasopharyngeal RT-PCR, expressed as low (at least one of the 3 targets with Ct  $\leq$  28, i.e. high viral  
166 shedding) or high (all 3 targets with Ct  $>$  28, i.e. low viral shedding), iii) the consumption of alcohol,  
167 coffee, food and smoking or tooth brushing before sample collection and iv) proven previous  
168 infection with SARS-CoV-2.

169 Sensitivity analyses were performed considering 6 alternate criteria for positivity for the reference  
170 standard: i)  $\geq$  2 positive targets with nasopharyngeal RT-PCR, ii)  $\geq$  1 positive target with  
171 nasopharyngeal RT-PCR and at least one of the 3 targets with Ct  $<$  32, iii)  $\geq$  1 positive target with  
172 saliva RT-PCR, iv)  $\geq$  1 positive target with either nasopharyngeal or saliva RT-PCR, v)  $\geq$  1 positive  
173 target with either nasopharyngeal or saliva RT-PCR and at least one of the 3 targets with Ct  $<$  32 and  
174 vi) nasopharyngeal antigen test.

175 Quantitative variables were compared with Wilcoxon's test, with a significance level of 5%. The  
176 sensitivity and specificity of canine detection and nasopharyngeal antigen tests were compared with  
177 McNemar's test. The statistical analysis was performed using R software (<http://cran.r-project.org/>).  
178 The reporting of results followed the Standards for Reporting Diagnostic accuracy studies (STARD  
179 2015) guideline [7].

180

## 181 RESULTS

182 The flow of participants is described in Figure 2. Between March 16 and April 9, 2021, 516  
183 participants were included in SALICOV-APHP study, 403 of whom agreed to provide an axillary  
184 sample. Among them, 68 were excluded; 335 patients were thus analyzed. The proportions of  
185 females and males were similar and median age of study participants was 35 years [25-49] (Table 1).  
186 The reasons expressed by the individuals to be tested were the presence of symptoms (41.2%), being  
187 contact cases (45.7%) or others (travel, voluntary testing, etc., 13.1%). Among the participants, 43%  
188 presented with symptoms on the day of testing. The median time since the last contact and since the  
189 first clinical symptom was 5 days [0-7] and 2 days [1-3], respectively.

190 Among the 335 participants, 109 (32.5%) tested positive on nasopharyngeal RT-PCR. The sensitivities  
191 and specificities for all the participants and according to the presence/absence of symptoms are  
192 presented in Table 2. The overall sensitivity of canine detection was 97% (95% CI, 92 to 99), reaching  
193 100% (95% CI: 89-100) for asymptomatic individuals. The specificity was 91% (95% CI, 87 to 95),  
194 reaching 94% (95% CI, 90 to 97) for asymptomatic individuals. The PPV and NPV (Positive and  
195 Negative Predictive Values) were 84% (95% CI, 77 to 90) and 99% (95% CI, 85 to 99), respectively. The  
196 sensitivity and specificity analysis of the diagnostic accuracy of the canine detection, as compared to  
197 other reference tests, is presented in Table 3.

198 Measures of diagnostic accuracy did not differ according to different subgroups: with or without a  
199 medical history of COVID, and having received medical treatment or not, tobacco, alcohol or coffee,  
200 and gender (data not shown). In addition, sensitivities were similar for high ( $Ct \leq 28$ ) and low ( $Ct >$   
201  $28$ ) viral loads: 97% (95% CI, 92 to 99) and 100% (95% CI, 59 to 100), respectively.

202 Among the 234 participants who agreed to the nasopharyngeal antigenic test, the sensitivity of  
203 canine detection was greater than that of the antigenic test (97% CI: 91 to 99 versus 84% CI: 74 to 90,  
204  $p=0.006$ ), but the specificity was lower (90% CI: 84 to 95 versus 97% CI: 93 to 99,  $p=0.016$ ).

205 To assess if the infection with other respiratory viruses could interfere with canine olfaction, saliva  
206 samples were tested with a multiplex PCR assay. Remaining saliva samples were available for 283  
207 out of 335 participants. Out of these 283 saliva samples, 87 saliva were positive for SARS-CoV-2 and



208 25 samples were positive for another pathogen : rhinovirus/enterovirus (n = 11), human  
209 coronaviruses (3 OC43 and 2 NL63), parainfluenza 3 (n = 2), bocavirus (n = 1), VRS (n = 2), bocavirus /  
210 VRS (n = 1), Influenza A H1 (n = 1), human metapneumovirus (n = 1), Bordetella pertussis (n = 1).  
211 Three co-infection with SARS-CoV-2 was identified. Out of 20 individuals tested negative for SARS-  
212 CoV-2 in NPS samples but found positive with canine olfaction, 17 samples were tested for multiplex  
213 detection in saliva. Fourteen had no other pathogene, two were positive for a coronavirus (NL63 and  
214 OC43) and one was positive for SARS-CoV-2. For the diagnosis of viral respiratory infection (other  
215 than SARS-CoV-2 infection), the sensitivity of canine detection was 20% (95% CI, 7% -41%) and the  
216 specificity was 62% (95% CI, 56% -68%).

217

218

## 219 **DISCUSSION**

220 Our results show the excellent sensitivity of SARS-CoV-2 detection by dogs using nasopharyngeal RT-  
221 PCR as the reference for comparison. These results are consistent with the results obtained  
222 previously in proof of concepts studies using sweat in hospitalized patients [5,8–11].

223 To our knowledge, this study is the first one carried out prospectively in the context of SARS-CoV-2  
224 screening and the first comparing dog detection and antigenic tests.

225 The results detailed showed no real difference in the sensitivity observed in the different subgroups:  
226 sensitivity is always over 95% when specificity ranges from 83% to 95%.

227 The results obtained by canine detection using sweat samples are comparable to those of  
228 nasopharyngeal antigenic tests. However, canine detection using sweat samples is less invasive than  
229 antigenic tests on nasopharyngeal samples. Thus, the detection of SARS-CoV-2 infection by dogs  
230 could be an alternative to antigenic tests.

231 Dog screening for SARS-CoV-2 seems specific for COVID-19 infection and not for viral infections in  
232 general since only 2 among the 17 saliva samples in false positive patients were positive for a virus  
233 other than SARS-CoV-2. Note, however, that in both cases, it was a coronavirus. We do not have  
234 enough patients negative for SARS-CoV-2 and positive for other coronaviruses to know whether the  
235 canine detection is specific for SARS-CoV-2 or for all coronaviruses.

236 Screening people directly, without going through sweat or saliva samples, could also be considered;  
237 the advantage would certainly be increased speed. The disadvantage is the fear of dogs exhibited by  
238 a significant number of individuals and the risk of dog contamination, which is not possible with the  
239 system we have used. Direct detection by dogs should be further evaluated.

240

241 A limitation of non-invasive detection of SARS-CoV-2 infection by canine olfaction is the availability of  
242 trained dogs in this approach in light of the very significant needs if canine detection were to be  
243 considered as an alternative to antigenic tests. Another limitation is the need for certification of the  
244 dogs used for SARS-CoV-2 detection because of the risk of involving dogs whose diagnostic  
245 performance is inferior to those shown here. At the time of the study, there was no delta viriants  
246 detected, but there is no reason to believe that the results would have been different in the presence  
247 of the delta variants.

248 To conclude, the results obtained in our prospective study involving 335 individuals who presented  
249 voluntarily in one of the APHP testing centers in Paris support the use of canine olfaction as an  
250 alternative to antigenic tests. Canine testing is non-invasive and provides immediate and reliable  
251 results. As for antigenic tests, positive results must be confirmed by RT-PCR, especially for variant  
252 screening. Further studies will be focused on direct sniffing by dogs to evaluate sniffer dogs for mass  
253 pre-test in airports, harbors, railways stations, cultural activities or sporting events. Axillary sweat  
254 testing could remain useful for small population testing or for mobile units acting on local clusters as  
255 an alternative to antigenic tests.

256

257

## 258 **Contributors**

259 Study concept and design: D.G., C.D., S.K., J.L.G., J.M.T.; Patients and controls recruitment: L. C., C.E.;  
260 Data collection: C.G., C.J., V.R., L.D., G.A., S.D., A.G., M.M.; Analysis and interpretation of data: C.E,  
261 J.M.T., D.G.; Drafting the manuscript: D.G., J.M.T. All the authors read and approved the final version  
262 of the manuscript. The authors assume responsibility for the accuracy and completeness of the data  
263 and analyses, as well as the adherence of the trial, its analyses and this report to the protocol.

264

265 **Funding**

266 The trial was supported by a grant from the French Ministry of Health, Region Ile de France and

267 Assistance Publique-Hôpitaux de Paris Foundation

268

269 **Declaration of interests**

270 All authors declare no competing interests

271

272 **Data sharing**

273 A data sharing statement provided by the authors is available with the full text of this article.

274 **Acknowledgments** We thank Quentin MUZZIN, Caroline ERDEVEN, Didier ROISSE, Nicolas DIRN,

275 Clément LEVERT, Erwan BRETON, Arnaud GALTAT, Fatma AL JASMI, Jamel ALHANAEE and Manea AL

276 BLOOSHI for their support in conducting this study, Naim Bouazza and Frantz Foissac for proofreading

277 the manuscript

278

279

## 280 References

- 281 1. Aksenov AA, Gojova A, Zhao W, Morgan JT, Sankaran S, Sandrock CE, et al. Characterization of  
282 volatile organic compounds in human leukocyte antigen heterologous expression systems: a  
283 cell's "chemical odor fingerprint." *Chembiochem*. 2012 May 7;13(7):1053–9.
- 284 2. Aksenov AA, Sandrock CE, Zhao W, Sankaran S, Schivo M, Harper R, et al. Cellular Scent of  
285 Influenza Virus Infection. *ChemBioChem*. 2014;15(7):1040–8.
- 286 3. Abd El Qader A, Lieberman D, Shemer Avni Y, Svobodin N, Lazarovitch T, Sagi O, et al. Volatile  
287 organic compounds generated by cultures of bacteria and viruses associated with respiratory  
288 infections. *Biomed Chromatogr*. 2015 Dec;29(12):1783–90.
- 289 4. Schivo M, Aksenov AA, Linderholm AL, McCartney MM, Simmons J, Harper RW, et al. Volatile  
290 emanations from in vitro airway cells infected with human rhinovirus. *J Breath Res*. 2014  
291 Sep;8(3):037110.
- 292 5. Grandjean D, Sarkis R, Lecoq-Julien C, Benard A, Roger V, Levesque E, et al. Can the detection  
293 dog alert on COVID-19 positive persons by sniffing axillary sweat samples? A proof-of-concept  
294 study. *PLOS ONE*. 2020 déc;15(12):e0243122.
- 295 6. Kernéis S, Elie C, Fourgeaud J, Choupeaux L, Delarue SM, Alby M-L, et al. Accuracy of saliva and  
296 nasopharyngeal sampling for detection of SARS-CoV-2 in community screening: a multicentric  
297 cohort study. *Eur J Clin Microbiol Infect Dis*. 2021 Aug 3;
- 298 7. Bossuyt PM, Cohen JF, Gatsonis CA, Korevaar DA, STARD group. STARD 2015: updated reporting  
299 guidelines for all diagnostic accuracy studies. *Ann Transl Med*. 2016 Feb;4(4):85.
- 300 8. Hag-Ali M, AlShamsi AS, Boeijen L, Mahmmod Y, Manzoor R, Rutten H, et al. The detection dogs  
301 test is more sensitive than real-time PCR in screening for SARS-CoV-2. *Commun Biol*. 2021 Jun  
302 3;4(1):1–7.
- 303 9. Sarkis R, Lichaa A, Mjaess G, Saliba M, Selman C, Lecoq-Julien C, et al. New method of screening  
304 for COVID-19 disease using sniffer dogs and scents from axillary sweat samples. *J Public Health*  
305 (Oxf). 2021 Jun 23;fdab215.
- 306 10. Angeletti S, Travaglino F, Spoto S, Pascarella MC, Mansi G, De Cesaris M, et al. COVID-19 sniffer  
307 dog experimental training: Which protocol and which implications for reliable identification? *J*  
308 *Med Virol*. 2021 Oct;93(10):5924–30.
- 309 11. Jendryn P, Schulz C, Twele F, Meller S, von Köckritz-Blickwede M, Osterhaus ADME, et al. Scent  
310 dog identification of samples from COVID-19 patients - a pilot study. *BMC Infect Dis*. 2020 Jul  
311 23;20(1):536.

312

313

314

315

316

317

318

319

320

321

## Tables and Figures

322 Table 1: Characteristics of study participants. Results are presented as N (%) or medians [interquartile  
323 ranges].

324

|                                                       | <b>Total<br/>(N=335)</b> |
|-------------------------------------------------------|--------------------------|
| Age — yr                                              | 35 [25-49]               |
| Females — no. (%)                                     | 170 (51)                 |
| Contact with a confirmed case — no. (%)               | 153 (46)                 |
| Time since last contact — days                        | 5 [0-7]                  |
| Presence of symptoms on the day of testing — no. (%)  | 143 (43)                 |
| Time from symptom onset — days                        | 2 [1-3]                  |
| Cough — no. (%)                                       | 59 (41)                  |
| Headache — no. (%)                                    | 63 (44)                  |
| Rhinorrhea — no. (%)                                  | 53 (37)                  |
| Asthenia — no. (%)                                    | 58 (41)                  |
| Muscle pain — no. (%)                                 | 46 (32)                  |
| Fever — no. (%)                                       | 38 (27)                  |
| Diarrhea — no. (%)                                    | 107 (8)                  |
| Chills — no. (%)                                      | 7 (5)                    |
| Anosmia — no. (%)                                     | 10 (7)                   |
| Shortness of breath — no. (%)                         | 7 (5)                    |
| Chest pain — no. (%)                                  | 7 (5)                    |
| Smoking in the last 24 hours — no. (%)                | 69 (21)                  |
| Consumption of alcohol in the last 24 hours — no. (%) | 71 (21)                  |
| Consumption of coffee in the last hour — no. (%)      | 53 (16)                  |
| Tooth brushing in the last 2 hours — no. (%)          | 122 (36)                 |
| Mouth washing in the last 2 hours — no. (%)           | 6 (2)                    |

325

326

327 Table 2: Diagnostic accuracy of canine detection as compared to the reference standard  
328 (nasopharyngeal RT-PCR, positivity defined as at least one target gene being detected), according to  
329 the presence of symptoms in study participants.  
330  
331

|                   | <b>Total, n</b> | <b>Positive sample, n</b> | <b>Sensitivity<br/>(95% CI*)</b> | <b>Specificity<br/>(95% CI*)</b> |
|-------------------|-----------------|---------------------------|----------------------------------|----------------------------------|
| <b>Overall</b>    | 335             | 109                       | 97% (92 to 99)                   | 91% (87 to 95)                   |
| <b>Symptoms</b>   | 143             | 78                        | 96% (89 to 99)                   | 83% (72 to 91)                   |
| <b>No symptom</b> | 192             | 31                        | 100% (89 to 100)                 | 94% (90 to 97)                   |

332 \*95% CI: 95% Confidence Interval

333  
334

335 Table 3: Sensitivity analysis of the diagnostic accuracy of canine detection, as compared to several  
 336 references.

| Reference standard                                                            | Total, n | Positive samples, n | Sensitivity (95% CI*) | Specificity (95% CI) |
|-------------------------------------------------------------------------------|----------|---------------------|-----------------------|----------------------|
| <b>NPS RT-PCR ≥ 2 targets</b>                                                 | 335      | 108                 | 97% (92 to 99)        | 91% (86 to 94)       |
| Symptoms                                                                      | 143      | 77                  | 96% (89 to 99)        | 82% (70 to 90)       |
| No symptoms                                                                   | 192      | 31                  | 100% (89 to 100)      | 94% (90 to 97)       |
| <b>NPS RT-PCR ≥ 1 target and Ct value &lt; 32</b>                             | 335      | 107                 | 97% (92 to 99)        | 90% (86 to 94)       |
| Symptoms                                                                      | 143      | 76                  | 96% (89 to 99)        | 81% (69 to 89)       |
| No symptoms                                                                   | 192      | 31                  | 100% (89 to 100)      | 94% (90 to 97)       |
| <b>Saliva RT-PCR ≥ 1 target</b>                                               | 320      | 80                  | 90% (81 to 96)        | 81% (75 to 86)       |
| Symptoms                                                                      | 136      | 53                  | 96% (87 to 100)       | 65% (54 to 75)       |
| No symptoms                                                                   | 184      | 27                  | 78% (58 to 91)        | 89% (83 to 94)       |
| <b>NPS RT-PCR ≥ 1 target or Saliva RT-PCR ≥ 1 target</b>                      | 327      | 116                 | 92% (86 to 96)        | 91% (87 to 95)       |
| Symptoms                                                                      | 142      | 79                  | 96% (89 to 99)        | 84% (73 to 92)       |
| No symptoms                                                                   | 185      | 37                  | 84% (68 to 94)        | 95% (90 to 98)       |
| <b>NPS RT-PCR ≥ 1 target or Saliva RT-PCR ≥ 1 target and Ct value &lt; 32</b> | 327      | 112                 | 95% (89 to 98)        | 91% (87 to 95)       |
| Symptoms                                                                      | 142      | 78                  | 96% (89 to 99)        | 83% (71 to 91)       |
| No symptoms                                                                   | 185      | 34                  | 91% (76 to 98)        | 95% (90 to 98)       |
| <b>NPS antigen</b>                                                            | 234      | 80                  | 95% (88 to 99)        | 83% (76 to 89)       |
| Symptoms                                                                      | 123      | 60                  | 97% (88 to 100)       | 71% (59 to 82)       |
| No symptoms                                                                   | 111      | 20                  | 90% (68 to 99)        | 91% (83 to 96)       |

337 \*95% CI : 95% Confidence Interval.

338

339



Figure 1B: Details of an olfaction cone, with a double-protected sample and no possibility of direct contact with the dog

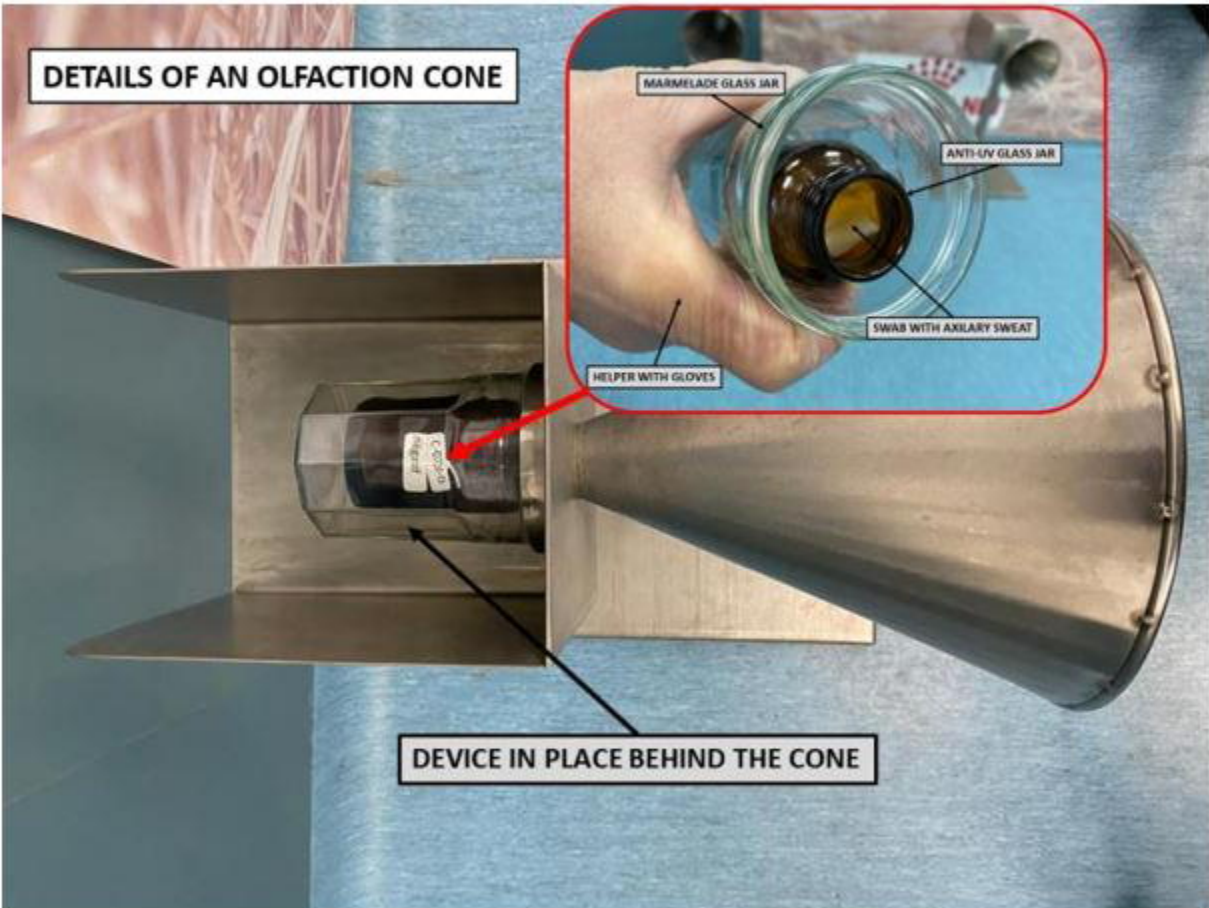

**DETAILS OF AN OLFACTION CONE**

MARMELADE GLASS JAR

ANTI-UV GLASS JAR

SWAB WITH AXILARY SWEAT

HELPER WITH GLOVES

**DEVICE IN PLACE BEHIND THE CONE**

Figure 1C: Process involving olfaction cones and dog

OLFACTION CONES IN THE TRAINING ROOM

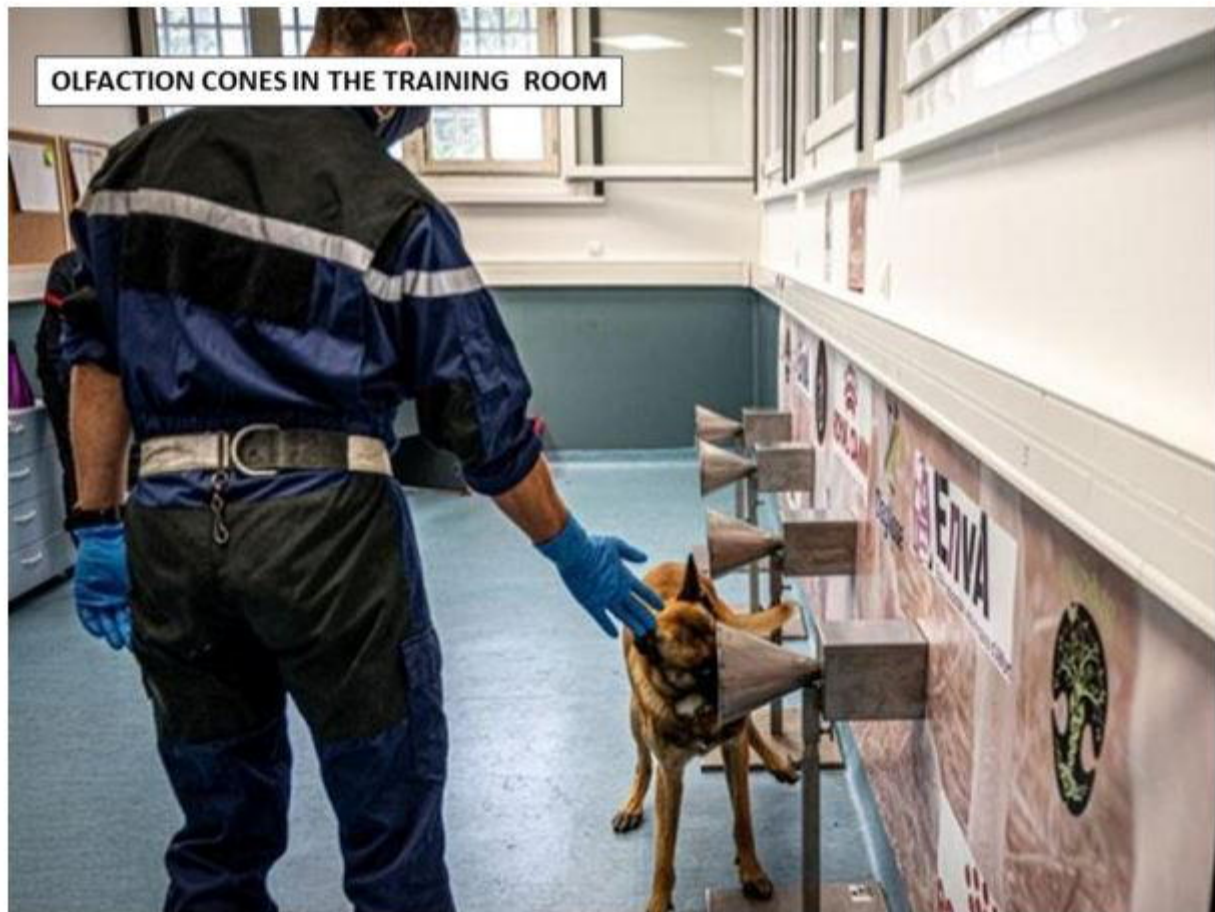

Figure 1D: Positive marking by a dog, sitting in front of a cone containing a positive sample

**POSITIVE MARKING ON A CONE**

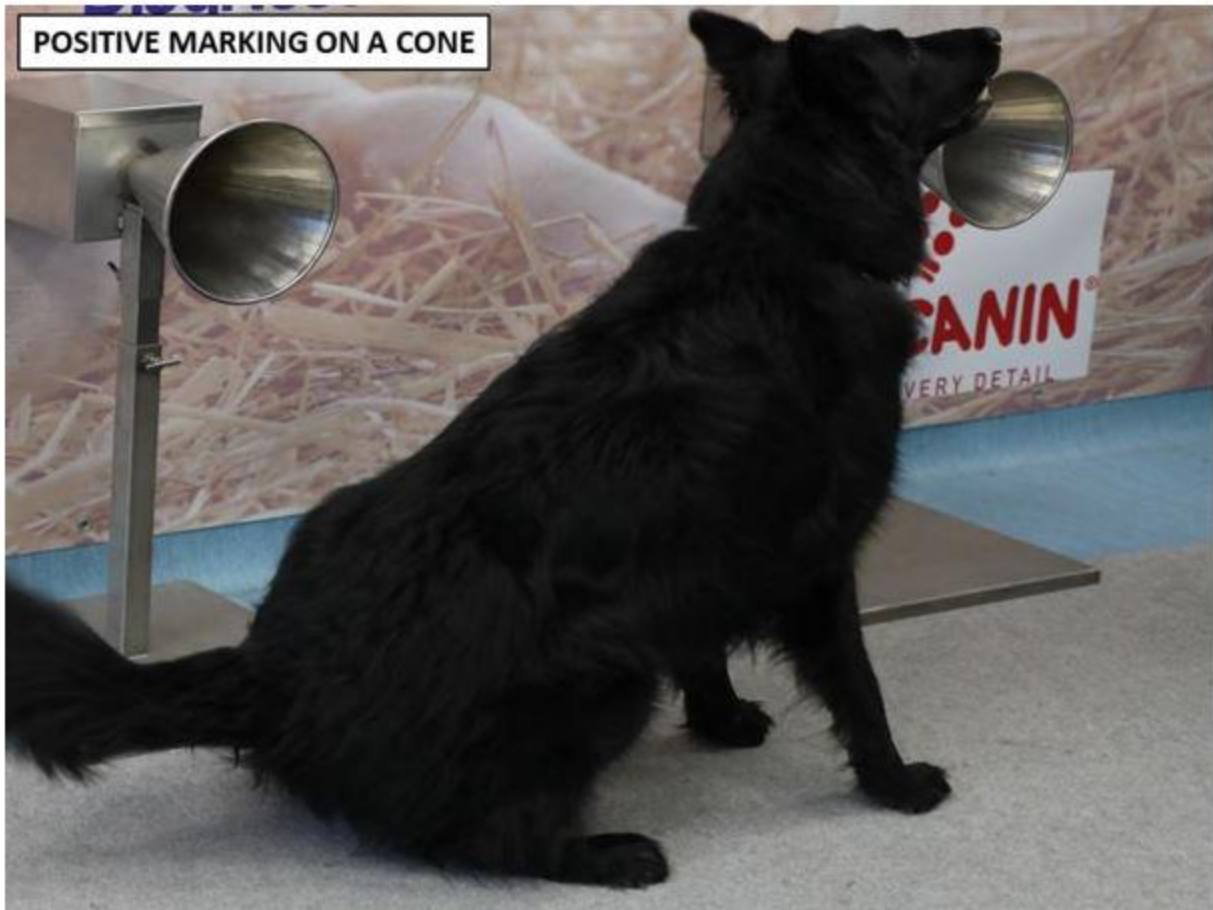

Figure 1A: Testing room with its olfaction cones

**OLFACTION CONES IN THE TESTING ROOM**

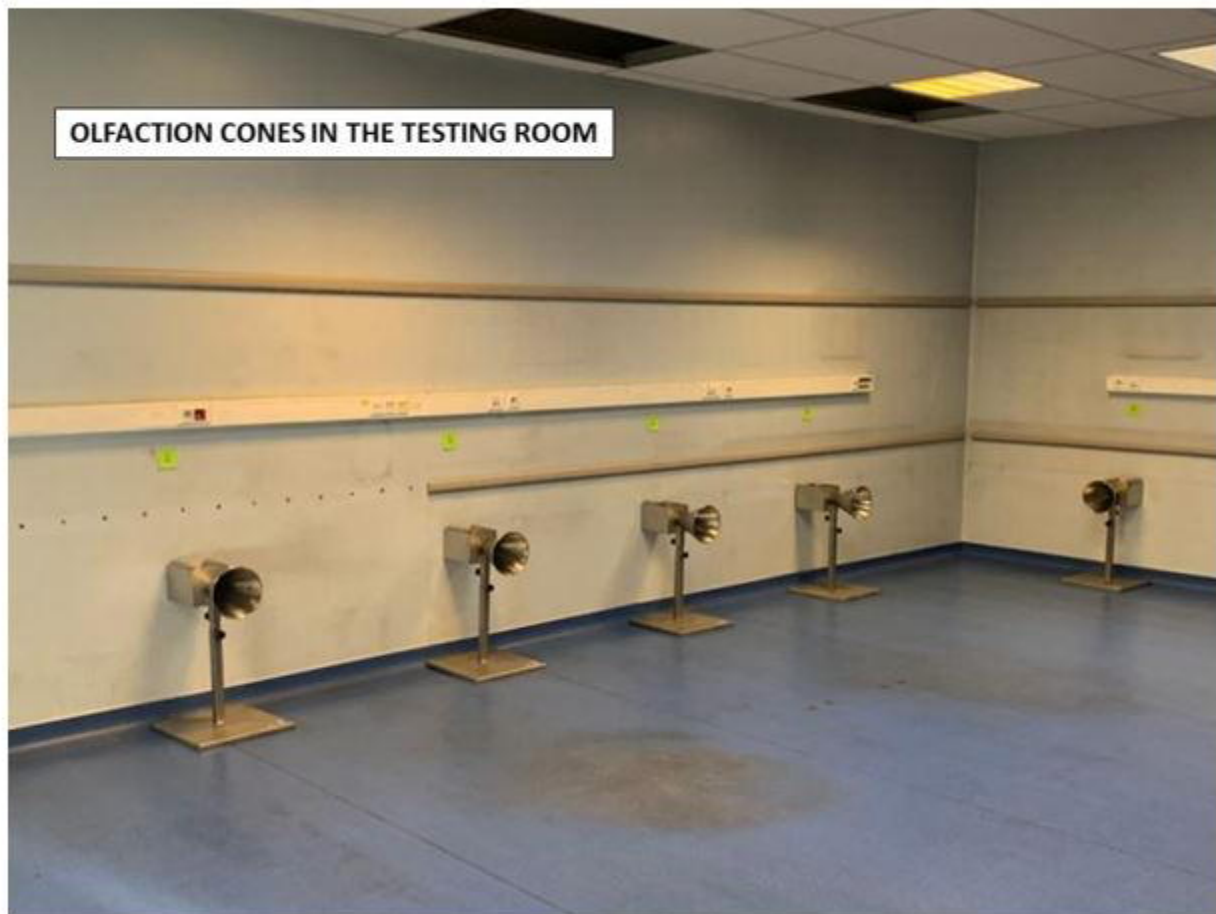

Figure 2: Flowchart of the study

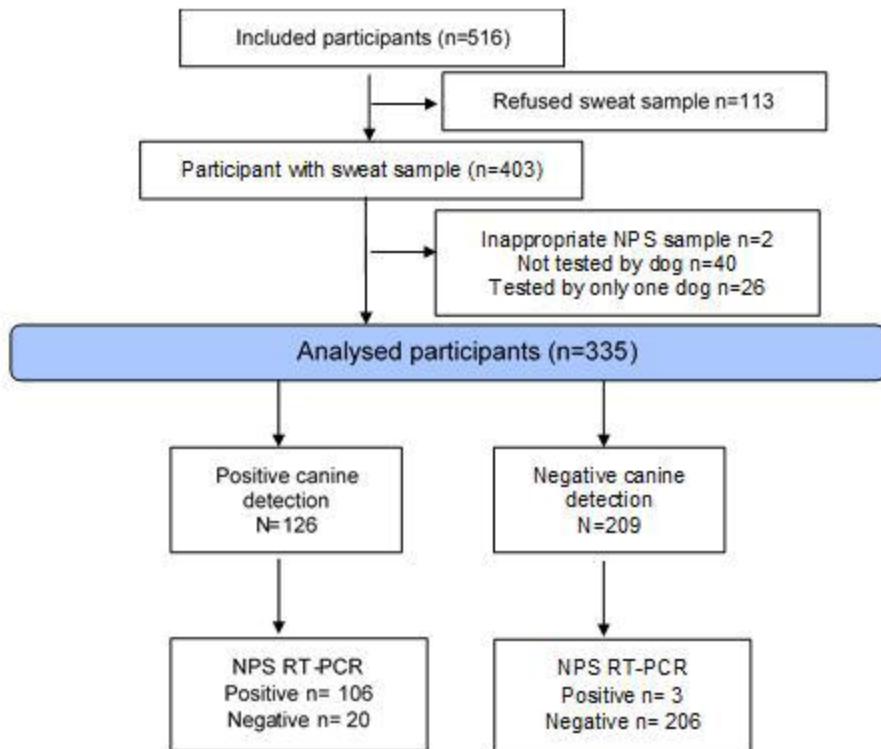

Source: https://medrxiv.org/content/10.1101/2022.03.07.22271219v1.full.pdf
